# Supplementary material for: Frequency and intensity of palaeofloods at the interface of Atlantic and Mediterranean climate domains
Source: Copernicus journal article supplement (doi:10.5194/cp-12-299-2016), 2016-02-17
Supplement: Supplementary file 1 [file cp-12-299-2016-supplement.pdf]

Supplement of *Clim. Past*, 12, 299–316, 2016  
<http://www.clim-past.net/12/299/2016/>  
doi:10.5194/cp-12-299-2016-supplement  
© Author(s) 2016. CC Attribution 3.0 License.

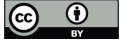

*Supplement of*

## **Frequency and intensity of palaeofloods at the interface of Atlantic and Mediterranean climate domains**

**B. Wilhelm et al.**

*Correspondence to:* B. Wilhelm ([bruno.wilhelm@ujf-grenoble.fr](mailto:bruno.wilhelm@ujf-grenoble.fr))

The copyright of individual parts of the supplement might differ from the CC-BY 3.0 licence.

### **Chronology: detailed methods for palaeomagnetic investigations**

Palaeomagnetic investigations were performed at the CEREGE laboratory (Aix-Marseille University) on cores FOR13P1, FOR13P2 and FOR13P4 using u-channels sub-samples. The natural remanent magnetization (NRM) was progressively demagnetized using alternating fields with 10, 20, 30, 40, 60, 80 and 100 mT steps. In order to distinguish different mineralogical and grain-size fractions within the magnetic components, two types of laboratory remanent magnetizations were conducted: Isothermal Remanent Magnetization (IRM) and Anhyseretic Remanent Magnetization (ARM). ARM was produced in-line along the u-channel axis, using a 100 mT alternating field with a superimposed 0.05 mT steady field. IRM was obtained by passing the u-channels through two different Halbach cylinders that develop fields of 1 and 0.3 T, respectively (Rochette et al., 2001). For ARM and IRM1T, demagnetization was done following steps of 10, 20, 30, 40, 60, 80 and 100 mT. The magnetizations have been measured before alternating-field treatment and after each step using the 3-axis 2-G enterprise cryogenic magnetometer located in a shielded room. Additionally, anisotropy of magnetic susceptibility has been measured using AGICO MFK1-FA Kappabridge (spinning specimen method) to control the preservation of the sedimentary fabric. The susceptibility ellipsoid is defined by three eigenvectors ( $K_{max}$ ,  $K_{int}$  and  $K_{min}$ ). The magnetic fabric is usually comparable to the sediment fabric with inclination of the  $K_{min}$  close to the vertical (Borradaile, 1988; Rochette et al., 1992; Tarling and Hrouda, 1993).

| <b>Flood date</b>  | <b>Affected rivers</b>       | <b>Spatial extent of the flood</b> | <b>Victim</b> | <b>Damage</b> | <b>Disruptions</b> | <b>Details on the hydro-meteorological causes</b>                        |
|--------------------|------------------------------|------------------------------------|---------------|---------------|--------------------|--------------------------------------------------------------------------|
| > 3 September 2012 | Guil                         | Ristolas and villages downstream   | N             | Y             | Y                  | Easterlies winds with heavy rainfalls in the upper part of catchment     |
| 28 May 2008        | Guil                         | Ristolas and villages downstream   | Y             | Y             | Y                  | Heavy rainfall event                                                     |
| 13 June 2002       | Torrents of Segure and other | Ristolas                           | N             | N             | N                  | Heavy rainfalls mainly in the upper part of the catchment                |
| > 15 July 2002     | Guil                         | Ristolas and villages downstream   | N             | Y             | Y                  | Easterlies winds with heavy rainfalls in the upper part of the catchment |
| > 15 October 2000  | Guil and other               | Ristolas and villages downstream   | N             | Y             | N                  | 5 days of heavy rainfalls with increased rainfall depths the last 2 days |
| 13 June 2000       | Guil and Torrent of Segure   | Ristolas and villages downstream   | N             | Y             | Y                  | Heavy rainfalls mainly in the upper part of the catchment                |
| > July 1992        | Torrent of Bouchouse         | Ristolas                           | N             | Y             | Y                  | Violent thunderstorms                                                    |
| 11 June 1978       | Guil                         | Ristolas and villages downstream   | N             | Y             | U                  |                                                                          |
| 5 May 1973         | Guil                         | Ristolas and villages downstream   | N             | Y             | U                  |                                                                          |
| > 1 November 1963  | Undefined                    | Ristolas                           | N             | Y             | U                  |                                                                          |
| 21 May 1959        | Guil                         | Ristolas and villages downstream   | N             | Y             | Y                  |                                                                          |
| > Summer 1959      | Guil                         | Ristolas and villages downstream   | N             | U             | Y                  |                                                                          |
| 13 June 1957       | Guil and Torrent of Segure   | Ristolas and villages downstream   | N             | Y             | Y                  | Heavy rainfalls, thunderstorm, snowmelt                                  |
| > October 1953     | Torrent of Jalinette         | Ristolas                           | N             | Y             | Y                  | Heavy rainfall event                                                     |
| > 29 Sept. 1953    | Guil                         | Ristolas and villages downstream   | N             | Y             | Y                  | Heavy rainfall event during 3 days                                       |
| > 1 July 1953      | Torrent of Jalinette         | Ristolas                           | N             | Y             | Y                  |                                                                          |
| 8 June 1953        | Guil                         | Ristolas and villages downstream   | N             | Y             | Y                  | Violent thunderstorms and snowmelt                                       |
| 14 May 1948        | Guil                         | Ristolas and villages downstream   | Y             | Y             | Y                  | Rainfall depth of 244 mm in 3 days, with snowmelt                        |
| > 4 August 1938    | Torrent of Segure            | Ristolas                           | N             | Y             | Y                  | Violent thunderstorms                                                    |
| 1932               | Torrent of Maloqueste        | Ristolas                           | N             | Y             | U                  |                                                                          |
| > 9 July 1932      | Guil                         | Ristolas and villages downstream   | N             | Y             | Y                  |                                                                          |
| > 1 September 1920 | Guil                         | Ristolas and villages downstream   | N             | Y             | Y                  |                                                                          |
| 29 May 1856        | Guil                         | Ristolas and villages downstream   | N             | U             | U                  | Heavy rainfalls over a long period before the flood event                |
| > 6 August 1852    | Guil                         | Ristolas and villages downstream   | N             | Y             | Y                  | Heavy rainfall events                                                    |
| > 15 October 1839  | Guil                         | Ristolas and villages downstream   | N             | Y             | U                  | Heavy rainfall events                                                    |
| > 13 Sept. 1810    | Guil and Torrent of Segure   | Ristolas and villages downstream   | N             | Y             | Y                  | Heavy rainfall events during 8 days                                      |
| > 13 October 1810  | Guil                         | Ristolas and villages downstream   | N             | Y             | Y                  |                                                                          |
| > 10 October 1791  | Guil and Torrent of Chapelle | Ristolas and villages downstream   | N             | Y             | Y                  |                                                                          |
| > 9 October 1790   | Guil                         | Ristolas and villages downstream   | N             | Y             | Y                  |                                                                          |
| 1789               | Guil                         | Ristolas and villages downstream   | N             | Y             | Y                  |                                                                          |
| > 07 Sept. 1788    | Guil                         | Ristolas and villages downstream   | N             | Y             | Y                  |                                                                          |
| > 7 September 1787 | Guil                         | Ristolas and villages downstream   | N             | Y             | U                  |                                                                          |
| > 4 October 1751   | Guil                         | Ristolas and villages downstream   | N             | U             | U                  | Heavy rainfall events                                                    |

**Table S1.** List of historical flood events which runs through the village of Ristolas, located 8 km downstream from Lake Foréant (from the free-access database of the ONF-RTM, <http://rtm-onf.ifn.fr/>). The arrows in the first row highlight the floods that occurred in summer and fall, i.e. that may be recorded in the lake sediments because this period corresponds to the ice-free season of Lake Foréant. N means No, Y means Yes and U, Uncertain.

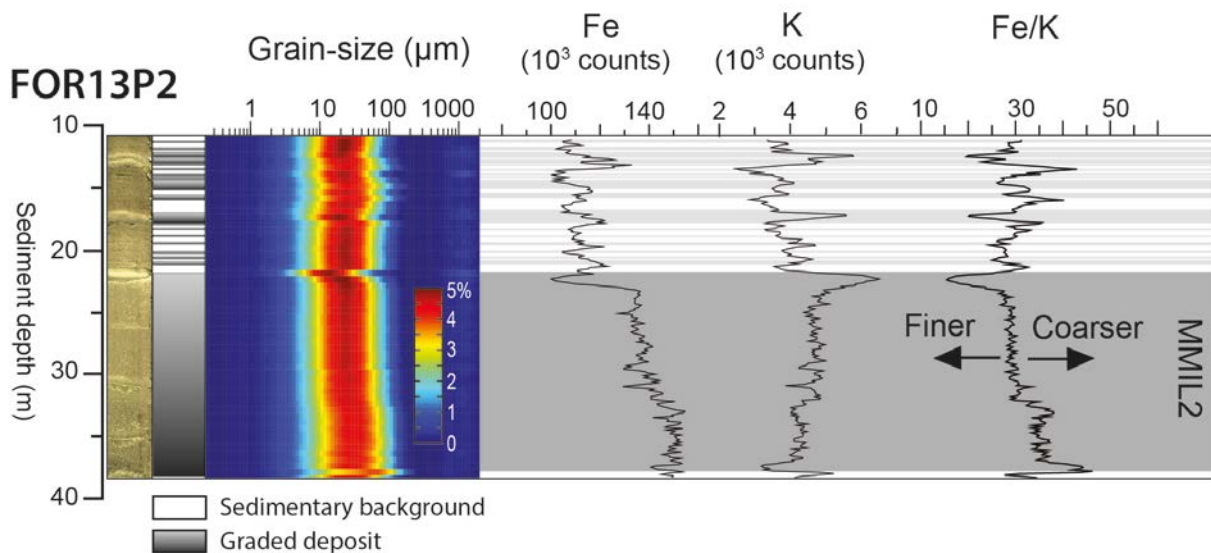

**Fig. S1.** Zoom of the grain-size variability and associated geochemical proxy for core FOR13P2. Refer to Figure 2 and to the main text for details.

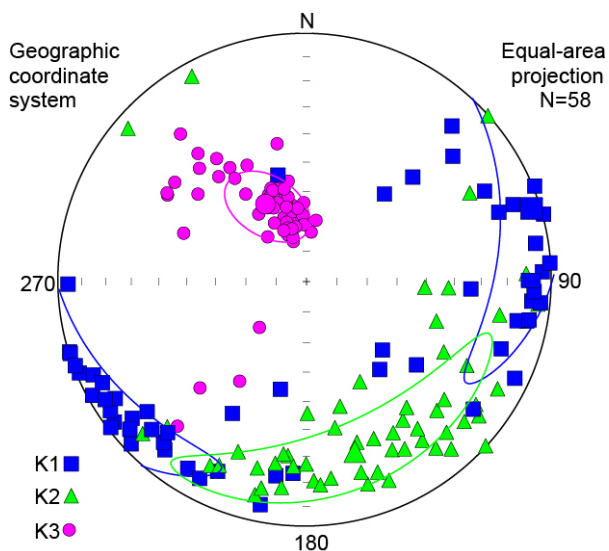

**Fig. S2.** Results of Anisotropy of Magnetic Susceptibility for core FOR13P4: stereo plot of the main axes direction. Notice that the K3 is well grouped and close to the vertical except some points associated with MMITs.

FOR13 P3 88 cm  
MAD = 2,17  
Units:  $2 \cdot 10^{-4}$  A/m

FOR13 P1 10 cm  
MAD=1,67  
Unit:  $10^{-4}$  A/m

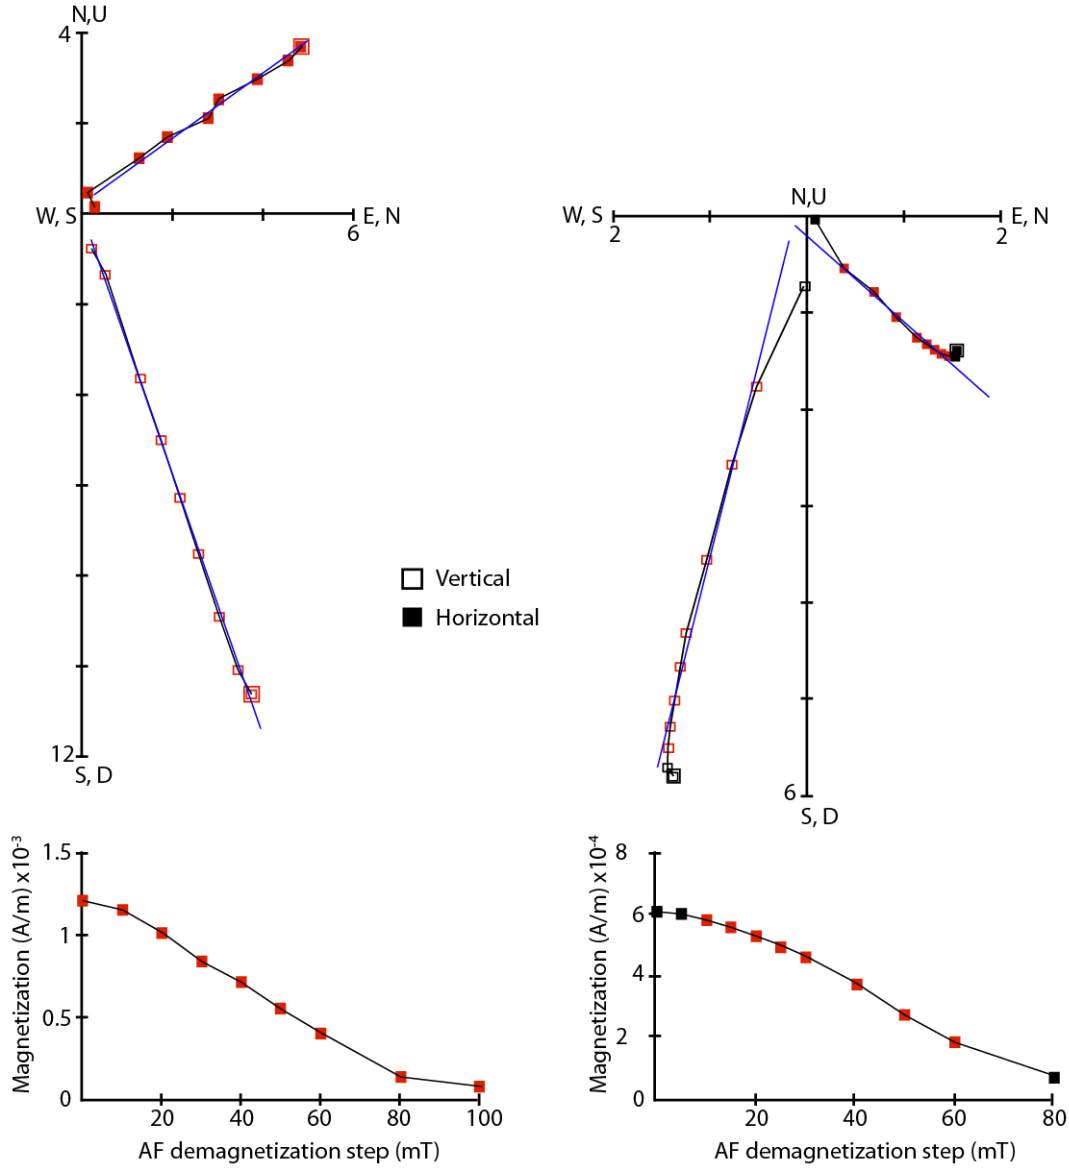

**Fig. S3.** Example of stepwise alternating field demagnetization of NRM (orthogonal vector projections and intensity curves) for representative samples. Solid (open) symbols are horizontal (vertical) plane projections.

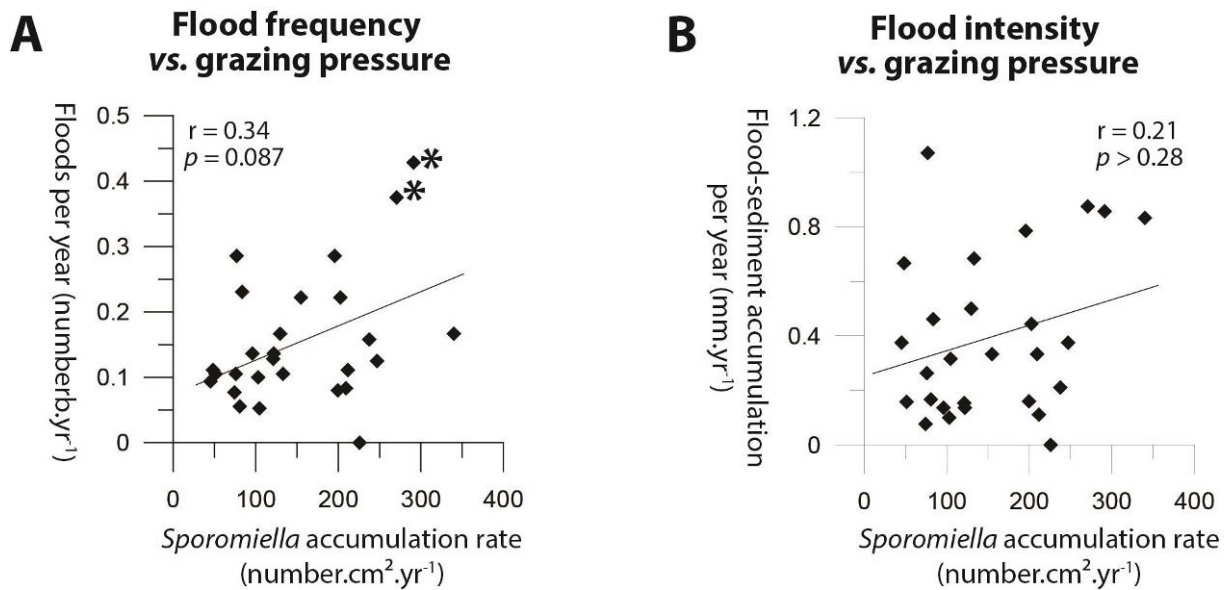

**Fig. S4.** Representation and correlation coefficients ( $r$ ) of relations between (A) *Sporormiella* accumulation rates (number.cm<sup>2</sup>.yr<sup>-1</sup>) and floods frequency (nb.yr<sup>-1</sup>), and between (B) *Sporormiella* accumulation rates (number. cm<sup>2</sup> yr<sup>-1</sup>) and flood-sediment accumulation (mm.years<sup>-1</sup>). The stars identified two samples, dated from 1734 to 1760 AD, with both high grazing pressure and high flood frequency. Levels of significance ( $p$  values) were determined using a Spearman-test.

#### References

- Rochette, P., Jackson, M., Aubourg, C.: Rock magnetism and the interpretation of anisotropy of magnetic susceptibility, *Reviews of Geophysics* 30 (3), 209–226, 1992.
- Rochette, P., Vadeboin, F., Clochard, L.: Rock magnetic applications of Halbach cylinders, *Physics of the Earth and Planetary Interiors* 126, 109–117, 2001.
- Borradaile, G.: Magnetic susceptibility, petrofabrics and strain, *Tectonophysics*, 156, 1–20, 1988.
- Tarling, D.H., Hrouda, F.: *The Magnetic Anisotropy of Rocks*, Chapman & Hall, London (218 pp.), 1993.
